# Supplementary material
Source: MDPI journal article supplement (https://www.mdpi.com/2073-4395/3/1/59)
Supplement: s1 [file s1]

**Table S1.** Effects of previous crop management (PCM), fertilization regime (FR), and watering regime (WR) on leaf SPAD measurements (units), 41 and 81 days after emergence.

| **Factor** | **41 days** | **81 days** |
| --- | --- | --- |
| Means (± SE) |  |  |
| WR |  |  |
| Restricted | 40.3 ± 0.4 | 35.9 ± 0.7 |
| Optimized | 37.6 ± 0.3 | 29.4 ± 0.5 |
| PCM |  |  |
| Conventional soil | 39.3 ± 0.4 | 32.6 ± 0.8 |
| Organic soil | 38.6 ± 0.3 | 32.7 ± 0.6 |
| FR |  |  |
| Control 0 N ha−1 | 37.2 ± 0.5 c | 30.1 ± 0.9 c |
| Composted cattle manure, 85 kg N ha−1 | 38.0 ± 0.6 c | 31.3 ± 1.0 c |
| Composted chicken manure pellets, 85 kg N ha−1 | 39.8 ± 0.5 b | 33.6 ± 1.2 b |
| Composted cattle manure, 170 kg N ha−1 | 37.9 ± 0.6 c | 31.4 ± 1.1 c |
| Composted chicken manure pellets, 170 kg N ha−1 | 41.8 ± 0.6 a | 37.0 ± 0.9 a |
| ANOVA |  |  |
| Main effects |  |  |
| WR | 0.0001 | 0.0009 |
| PCM | 0.0313 | ns |
| FR | <0.0001 | <0.0001 |
| Interaction effects |  |  |
| WR × PCM | 0.0427 | 0.0002 |
| WR × FR | 0.0908 | ns |
| PCM × FR | ns | ns |
| WR × PCM × FR | ns | ns |

**Table S2.** Effect of the interaction between watering regime and previous crop management on leaf SPAD measurements (units), 41 and 81 days after emergence, and tuber N concentration.

|  | **41 days** | **81 days** | **N (%)** |
| --- | --- | --- | --- |
| Restricted watering |  |  |  |
| PCMcon | 41.0 ± 0.6 | 36.9 ± 1.1 | 1.20 ± 0.04 |
| PCMorg | 39.6 ± 0.5 | 34.8 ± 0.9 | 1.12 ± 0.03 |
| Optimized watering |  |  |  |
| PCMcon | 37.6 ± 0.5 | 28.4 ± 0.7 | 0.99 ± 0.03 |
| PCMorg | 37.6 ± 0.5 | 30.6 ± 0.5 | 1.07 ± 0.03 |

**Table S3.** Effects of previous crop management (PCM), fertilization regime (FR), and watering regime (WR) on potato yield size distribution.

|  | **Tuber size 65–85 mm** | | **Tuber size 45–65 mm** | | **Tuber size <45 mm** | |
| --- | --- | --- | --- | --- | --- | --- |
| Factor | Tubers plant−1 | Fresh weight (g) plant−1 | Tubers plant−1 | Fresh weight (g)  plant−1 | Tubers plant−1 | Fresh weight (g)  plant−1 |
| Means (± SE) |  |  |  |  |  |  |
| WR |  |  |  |  |  |  |
| Restricted | 3.8 ± 0.1 | 327.4 ± 13.7 | 5.5 ± 0.3 | 223.4 ± 11.8 | 3.8 ± 0.3 | 25.7 ± 2.1 |
| Optimized | 4.7 ± 0.2 | 446.5 ± 18.9 | 6.5 ± 0.3 | 265.5 ± 12.8 | 2.8 ± 0.2 | 20.6 ± 1.7 |
| PCM |  |  |  |  |  |  |
| Conventional soil | 4.6 ± 0.2 | 419.1 ± 18.3 | 6.2 ± 0.3 | 244.0 ± 12.9 | 4.4 ± 0.3 | 29.8 ± 2.0 |
| Organic soil | 3.9 ± 0.2 | 354.8 ± 16.6 | 5.8 ± 0.3 | 244.9 ± 12.1 | 2.3 ± 0.2 | 16.5 ± 1.4 |
| FR |  |  |  |  |  |  |
| Control 0 N ha−1 | 3.6 ± 0.3 b | 306.9 ± 26.9 d | 5.8 ± 0.4 | 236.2 ± 19.2 | 2.8 ± 0.3 b | 18.9 ± 2.2 b |
| Cattle manure compost, 85 kg N ha−1 | 3.7 ± 0.3 b | 347.4 ± 27.1 cd | 6.0 ± 0.5 | 250.1 ± 20.6 | 3.1 ± 0.4 b | 22.8 ± 2.8 b |
| Composted chicken manure pellets, 85 kg N ha−1 | 4.6 ± 0.2 a | 423.7 ± 27.3 ab | 5.4 ± 0.5 | 223.7 ± 20.0 | 3.1 ± 0.4 b | 21.4 ± 3.4 b |
| Composted cattle manure, 170 kg N ha−1 | 4.5 ± 0.3 a | 395.0 ± 24.4 bc | 6.4 ± 0.5 | 240.2 ± 18.1 | 3.1 ± 0.4 b | 20.8 ± 2.7 b |
| Composted chicken manure pellets, 170 kg N ha−1 | 4.8 ± 0.3 a | 461.7 ± 27.8 a | 6.5 ± 0.5 | 272.0 ± 20.8 | 4.4 ± 0.4 a | 31.8 ± 3.4 a |
| ANOVA |  |  |  |  |  |  |
| Main effects |  |  |  |  |  |  |
| WR | 0.0084 | 0.0031 | 0.0910 | 0.0677 | 0.0251 | 0.0783 |
| PCM | 0.0037 | 0.0013 | ns | ns | <0.0001 | <0.0001 |
| FM | 0.0004 | <0.0001 | ns | ns | 0.0174 | 0.0118 |
| Interaction effects |  |  |  |  |  |  |
| WR × PCM | ns | ns | ns | ns | ns | ns |
| WR × FR | ns | ns | ns | ns | ns | ns |
| PCM × FR | ns | ns | ns | ns | ns | ns |
| WR × PCM × FR | ns | ns | ns | ns | ns | ns |

**Table S4.** Effect of the interaction between previous crop management and fertilization regime on tuber N concentration.

|  | **N (%)** |
| --- | --- |
| PCMcon |  |
| Control 0 N ha−1 | 1.01 ± 0.05 c |
| Composted cattle manure, 85 kg N ha−1 | 1.13 ± 0.07 abc |
| Composted chicken manure pellets, 85 kg N ha−1 | 1.01 ± 0.04 c |
| Composted cattle manure, 170 kg N ha−1 | 1.13 ± 0.06 abc |
| Composted chicken manure pellets, 170 kg N ha−1 | 1.20 ± 0.06 a |
| PCMorg |  |
| Control 0 N ha−1 | 1.03 ± 0.04 bc |
| Composted cattle manure, 85 kg N ha−1 | 1.06 ± 0.04 bc |
| Composted chicken manure pellets, 85 kg N ha−1 | 1.16 ± 0.06 ab |
| Composted cattle manure, 170 kg N ha−1 | 1.14 ± 0.04 ab |
| Composted chicken manure pellets, 170 kg N ha−1 | 1.09 ± 0.04 abc |
